# Supplementary material for: Validation and optimization of the diatom L/D ratio as a diagnostic marker for drowning
Source: PubMed Central journal article supplement (PMC10085902; doi:10.1007/s00414-023-02970-x), 2023-03-04
Supplement: 414_2023_2970_MOESM1_ESM.pdf [file 414_2023_2970_MOESM1_ESM.pdf]

# Supplements

## 1. SEM control images

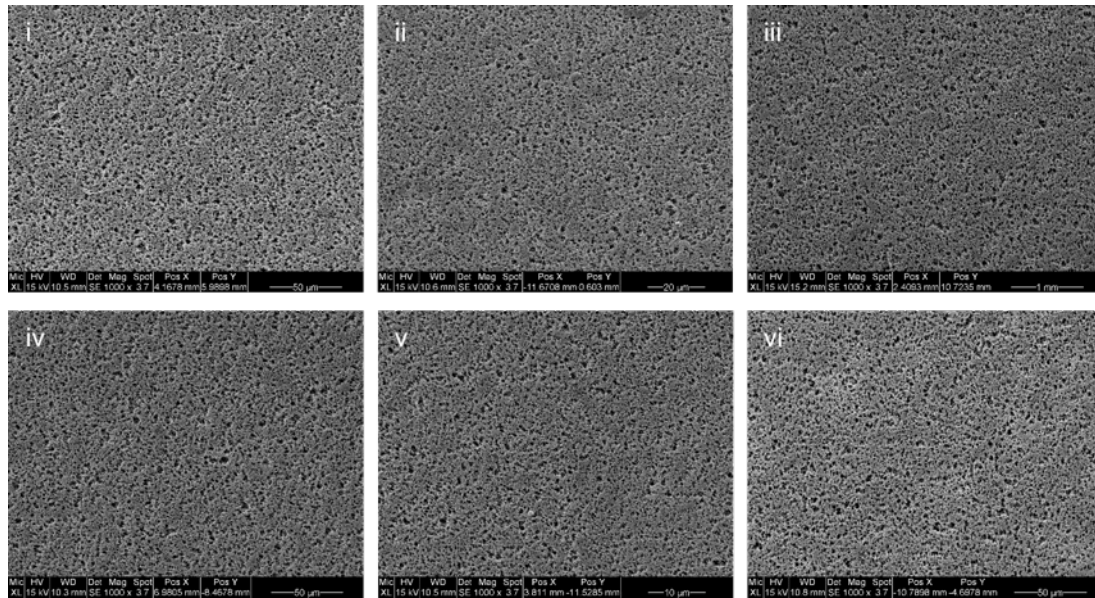

**Figure S1** Exemplary negative control images for diatom-content in working reagents; i nitric acid, ii hydrogen peroxide, iii ultrapure water, iv ethanol, v tap water, vi digestion vapor

## 2. Qualitative SEM analysis of peripheral tissue

**Table S1** Qualitative SEM-analysis for diatoms in liver- and kidney tissue of case 1-5; (-) indicates zero diatoms, (+) indicates  $\geq 1$  diatoms, (++) indicates  $\geq 5$  diatoms, (+++) indicates  $\geq 10$  diatoms

| case no. | liver | kidney |
|----------|-------|--------|
| 1        | ++    | +++    |
| 2        | -     | ++     |
| 3        | -     | +      |
| 4        | ++    | ++     |
| 5        | +++   | +++    |

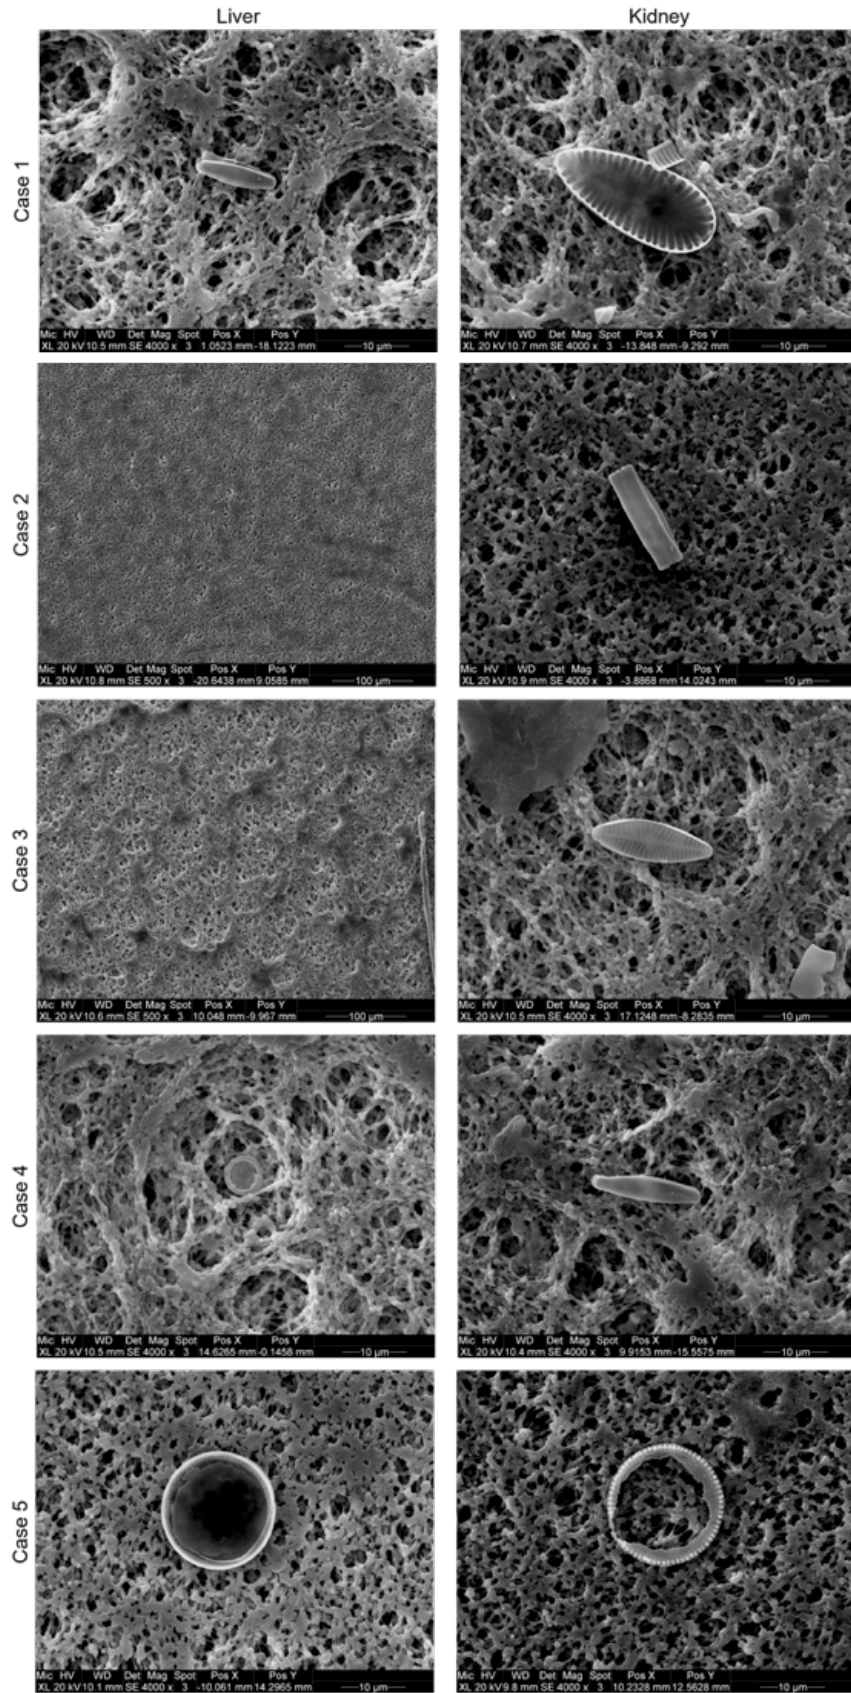

Figure S2 Exemplary images of diatoms in liver- and kidney tissue of cases 1-5.
